# Supplementary material for: Carbon Dots Anchoring Single-Atom Pt on C3N4 Boosting Photocatalytic Hydrogen Evolution
Source: MDPI journal article supplement (doi:10.3390/molecules29081890), 2024-04-21
Supplement: s1 [file s1]

---

## Supporting Information

# Carbon Dots Anchoring Pt Single Atoms on C<sub>3</sub>N<sub>4</sub> Boosting Photocatalytic Hydrogen Evolution

Jing Wang, Jiayu Song, Xin Kang, Dongxu Wang, Chungui Tian, Qin Zhang, Hui Zhao, Jiancong

Liu \*

Key Laboratory of Functional Inorganic Material Chemistry, Ministry of Education of the People's  
Republic of China, Heilongjiang University, Harbin 150080, China

\* Corresponding authors

E-mail addresses: liujiancong@hlju.edu.cn or jiancong@gmail.com

## The content of ESI

1. **Figure S1.** SEM image of the 5-CDs/FC<sub>3</sub>N<sub>4</sub>.
2. **Figure S2.** SEM image of the 15-CDs/FC<sub>3</sub>N<sub>4</sub>.
3. **Figure S3.** SEM image of the B-C<sub>3</sub>N<sub>4</sub>.
4. **Figure S4.** SEM image of the C<sub>3</sub>N<sub>4</sub>.
5. **Figure S5.** XRD patterns of 5-CDs/C<sub>3</sub>N<sub>4</sub>, 15-CDs/C<sub>3</sub>N<sub>4</sub>, CDs/C<sub>3</sub>N<sub>4</sub>.
6. **Figure S6.** Peak-differentiating analysis of the N1 and N2 peaks in the <sup>15</sup>N NMR spectra of CDs/C<sub>3</sub>N<sub>4</sub> and C<sub>3</sub>N<sub>4</sub>.
7. **Figure S7.** (a) Transient photocurrent response of C<sub>3</sub>N<sub>4</sub> and CDs/C<sub>3</sub>N<sub>4</sub> with repeated on-off cycles under simulated sunlight irradiation, (b) Linear sweeps voltammograms of C<sub>3</sub>N<sub>4</sub> and CDs/C<sub>3</sub>N<sub>4</sub>.
8. **Figure S8.** The particle size distribution map of Pt nanoparticles on C<sub>3</sub>N<sub>4</sub>.
9. **Figure S9.** XPS survey spectrum of Pt-C<sub>3</sub>N<sub>4</sub> and Pt-CDs/C<sub>3</sub>N<sub>4</sub>.
10. **Figure S10.** Photocatalytic H<sub>2</sub> evolution rate for 5-CDs/C<sub>3</sub>N<sub>4</sub> and 15-CDs/C<sub>3</sub>N<sub>4</sub>.
11. **Table S1.** Type and contents of elements of different samples.
12. **Table S2.** Type and contents of elements of different samples.
13. **Table S3.** PL lifetime of photogenerated charge carrier.
14. **Table S4.** EXAFS fitting parameters at the Pt L3-edge for various samples ( $S_0^2=0.925$ ).
15. **Table S5.** Photocatalytic hydrogen evolution performance for Pt-CDs/C<sub>3</sub>N<sub>4</sub> composite in comparison with other CN-based photocatalysts that reported in recent years.

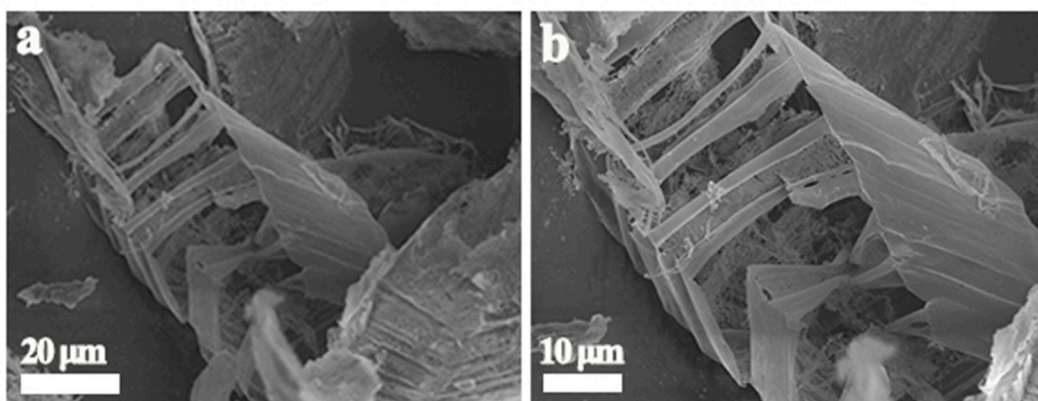

**Figure S1.** SEM image of the 5-CDs/C<sub>3</sub>N<sub>4</sub>.

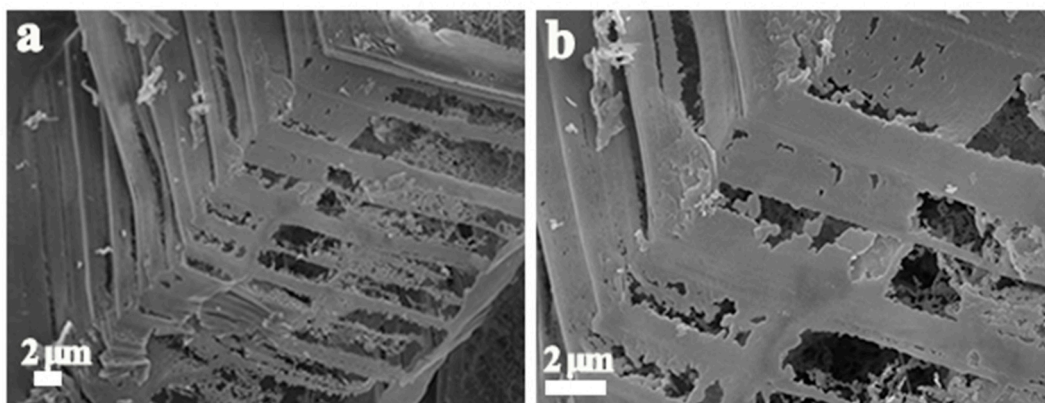

**Figure S2.** SEM image of the 15-CDs/C<sub>3</sub>N<sub>4</sub>.

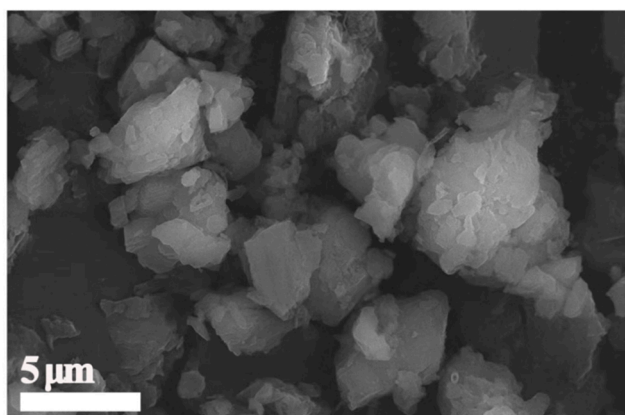

**Figure S3.** SEM image of the B-C<sub>3</sub>N<sub>4</sub>.

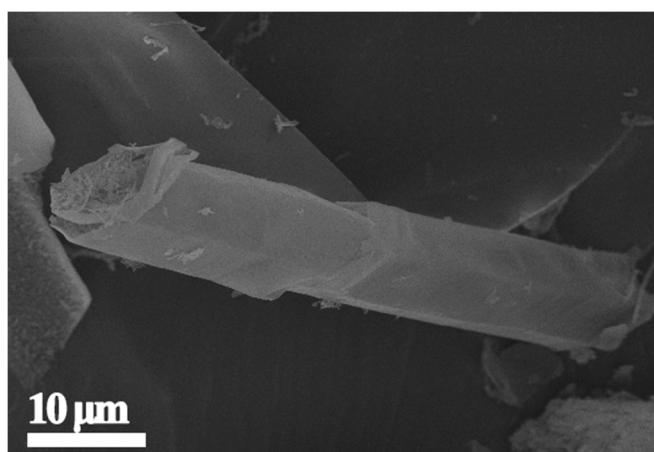

Figure S4. SEM image of the C<sub>3</sub>N<sub>4</sub>.

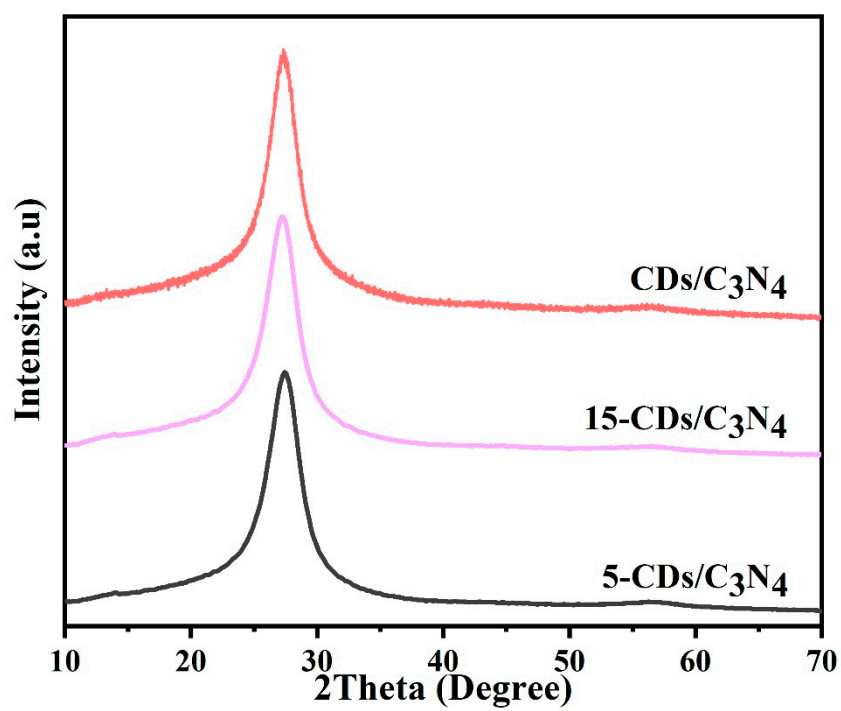

Figure S5. XRD patterns of 5-CDs/ C<sub>3</sub>N<sub>4</sub>, 15-CDs/ C<sub>3</sub>N<sub>4</sub>, CDs/C<sub>3</sub>N<sub>4</sub>.

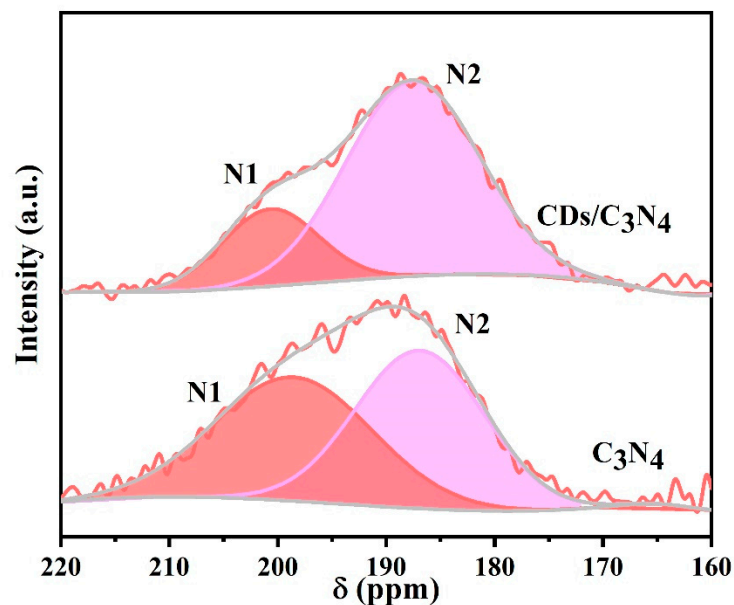

**Figure S6.** Peak-differentiating analysis of the N1 and N2 peaks in the  $^{15}\text{N}$  NMR spectra of CDs/C<sub>3</sub>N<sub>4</sub> and C<sub>3</sub>N<sub>4</sub>.

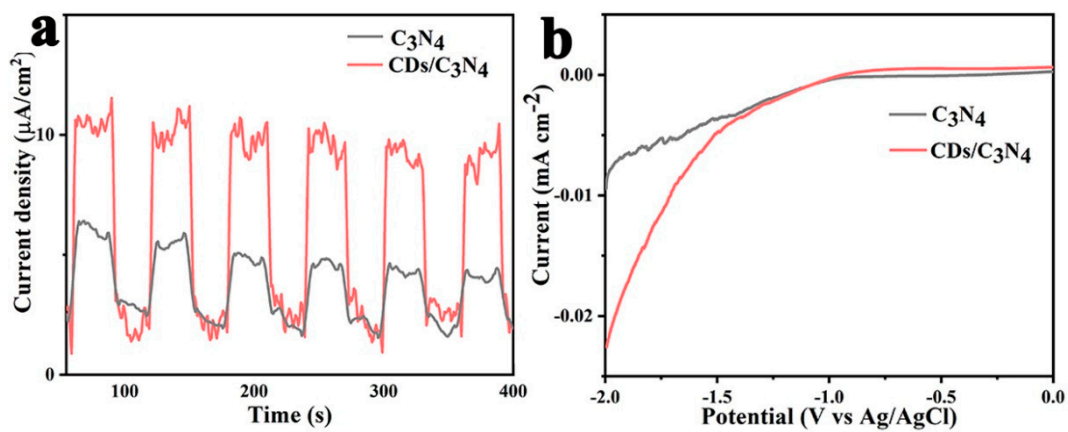

**Figure S7.** (a) Transient photocurrent response of C<sub>3</sub>N<sub>4</sub> and CDs/C<sub>3</sub>N<sub>4</sub> with repeated on-off cycles under simulated sunlight irradiation, (b) Linear sweeps voltammograms of C<sub>3</sub>N<sub>4</sub> and CDs/C<sub>3</sub>N<sub>4</sub>.

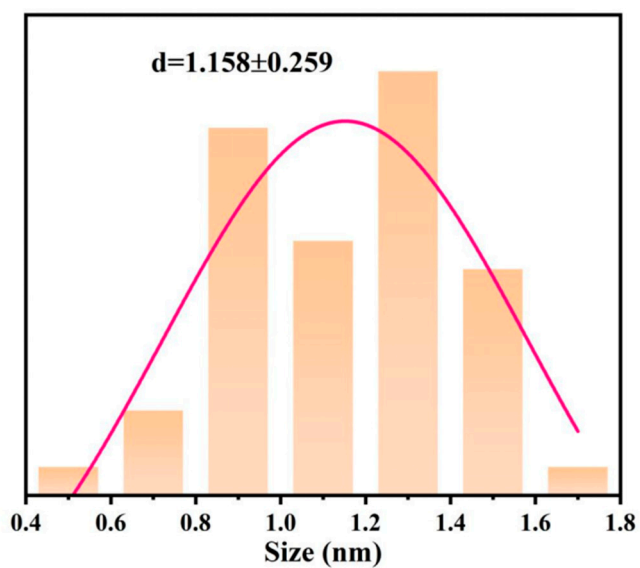

Figure S8. The particle size distribution map of Pt nanoparticles on C<sub>3</sub>N<sub>4</sub>.

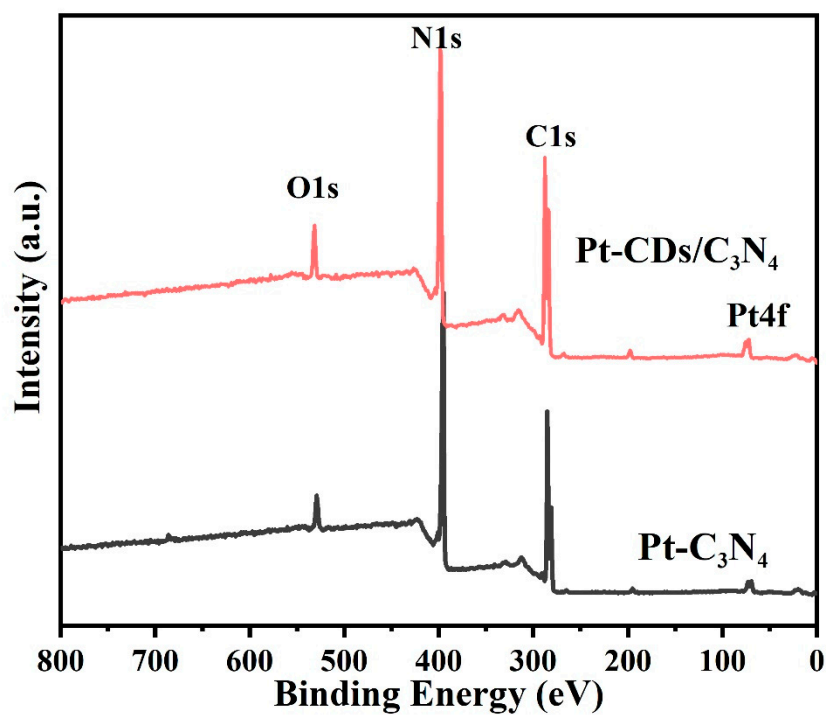

Figure S9. XPS survey spectrum of Pt-C<sub>3</sub>N<sub>4</sub> and Pt-CDs/ C<sub>3</sub>N<sub>4</sub>.

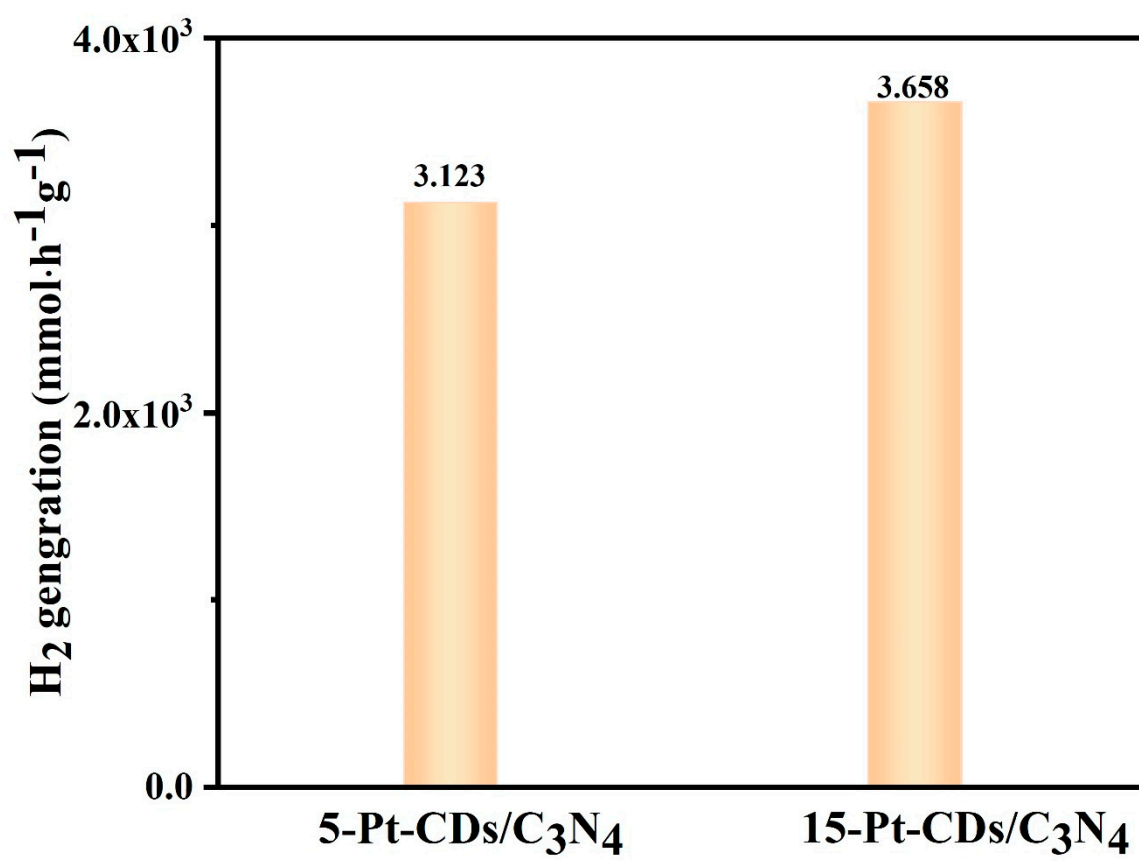

**Figure S10.** Photocatalytic H<sub>2</sub> evolution rate for 5-Pt-CDs/ C<sub>3</sub>N<sub>4</sub> and 15-Pt-CDs/C<sub>3</sub>N<sub>4</sub>.

**Table S1.** Type and contents of elements of different samples.

| Samples                           | Type and contents of elements (%) |                   |      |
|-----------------------------------|-----------------------------------|-------------------|------|
|                                   |                                   | C                 |      |
|                                   | N-C=N                             | C-NH <sub>x</sub> | C-C  |
| C <sub>3</sub> N <sub>4</sub>     | 61.7                              | 4.8               | 33.5 |
| CDs/C <sub>3</sub> N <sub>4</sub> | 48                                | 6.5               | 45.5 |

**Table S2.** Type and contents of elements of different samples.

| Samples                           | Type and contents of elements (%) |                    |      |
|-----------------------------------|-----------------------------------|--------------------|------|
|                                   |                                   | Nitrogen           |      |
|                                   | C-N=C                             | N-(C) <sub>3</sub> | C-NH |
| C <sub>3</sub> N <sub>4</sub>     | 72.7                              | 13.0               | 14.3 |
| CDs/C <sub>3</sub> N <sub>4</sub> | 73.7                              | 10.4               | 15.9 |

**Table S3.** PL lifetime of photogenerated charge carrier

| Samples                           | $\tau_1$ (ns) [A <sub>1</sub> ] | $\tau_2$ (ns) [A <sub>2</sub> ] | $\tau_{Ave}$ (ns) |
|-----------------------------------|---------------------------------|---------------------------------|-------------------|
| C <sub>3</sub> N <sub>4</sub>     | 2.9575 [48.56]                  | 12.6506 [51.44]                 | 7.94              |
| CDs/C <sub>3</sub> N <sub>4</sub> | 2.7788 [40.30]                  | 15.3544 [59.7]                  | 10.28             |

**Table S4.** EXAFS fitting parameters at the Pt L3-edge for various samples ( $S_0^2=0.925$ ).

| Sample    | Shell | CN <sup>a</sup> | R(Å) <sup>b</sup> | $\sigma^2$ (Å <sup>2</sup> ·10 <sup>-3</sup> ) <sup>c</sup> | $\Delta E_0$ (eV) <sup>d</sup> | R factor (%) |
|-----------|-------|-----------------|-------------------|-------------------------------------------------------------|--------------------------------|--------------|
| Sample-Pt | Pt-N  | 4.5±0.19        | 2.14±0.02         | 0.003±0.004                                                 | 7.54±2.53                      | 1.57         |



**Table S5.** Photocatalytic hydrogen evolution performance for Pt-CDs/C<sub>3</sub>N<sub>4</sub> composite in comparison with other CN-based photocatalysts that reported in recent years.

| Photocatalyst                     | Experimental details<br>(electron donor, co catalyst, light source) | H <sub>2</sub> productivity<br>(mmol h <sup>-1</sup> g <sup>-1</sup> ) | Ref.      |
|-----------------------------------|---------------------------------------------------------------------|------------------------------------------------------------------------|-----------|
| CDs/C <sub>3</sub> N <sub>4</sub> | TEOA, Pt (1 wt%),<br>300W Xenon lamp,<br>AM1.5                      | 15.09                                                                  | This work |
| PCN/NCDs                          | TEOA, Pt(1 wt%),<br>300 W Xenon Lamp,<br>$\lambda > 420\text{nm}$   | 3.731                                                                  | [22]      |
| HCNS – C <sub>1.0</sub>           | TEOA, Pt(3 wt%),<br>300 W Xenon Lamp,<br>$\lambda > 420\text{nm}$   | 2.322                                                                  | [49]      |
| CDs/S-HTCN                        | TEOA, Pt (1 wt%),<br>300W Xenonlamp,<br>AM1.5                       | 9.284                                                                  | [50]      |
| GICN                              | TEOA, Pt (3 wt%),<br>300 W Xenon Lamp,<br>$\lambda > 420\text{nm}$  | 2.684                                                                  | [13]      |
| P/UH-CNS                          | TEOA, Pt (2 wt%),<br>300 W Xenon Lamp,<br>$\lambda > 420\text{nm}$  | 2.814                                                                  | [51]      |
| 3DOM V-CN                         | TEOA, Pt (3 wt%),<br>300 W Xenon Lamp,<br>$\lambda > 420\text{nm}$  | 2.3                                                                    | [10]      |
